# Supplementary material for: VEGFA and NFE2L2 Gene Expression and Regulation by MicroRNAs in Thyroid Papillary Cancer and Colloid Goiter
Source: PubMed Central journal article supplement (PMC7563674; doi:10.3390/genes11090954), 2020-08-19
Supplement: genes-11-00954-s001.pdf [file genes-11-00954-s001.pdf]

## Supplementary material

The TCGA thyroid cancer dataset of genes VEGFA and NFE2L2.

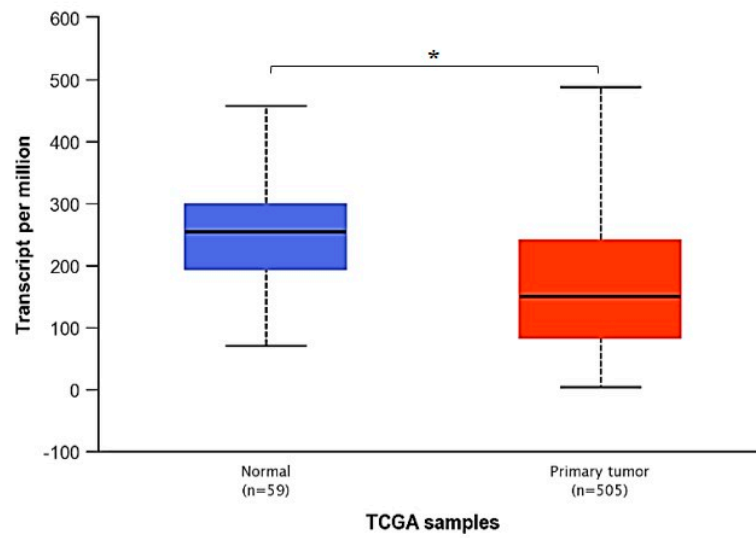

Figure 1. Expression of VEGFA in THCA based on Sample types

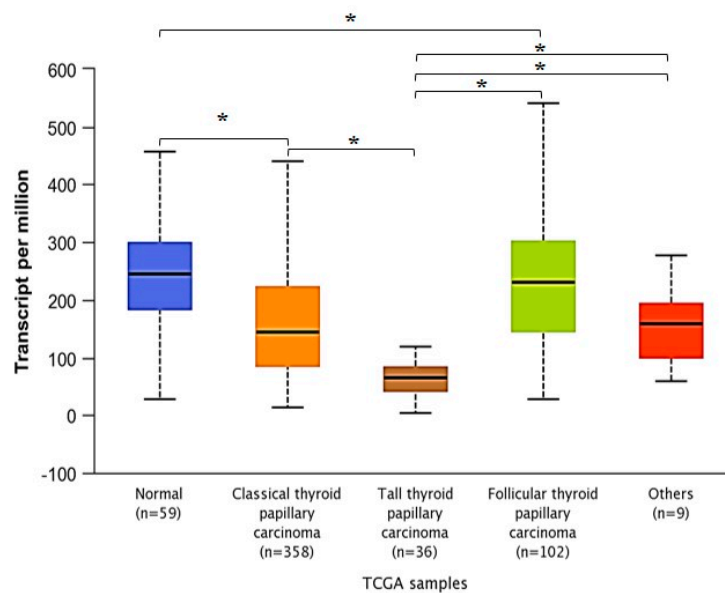

Figure 2. Expression of VEGFA in THCA based on Tumor histology

Tabela 1 – P values for VEGFA gene comparisons.

| Comparison              | Statistical significance |
|-------------------------|--------------------------|
| Normal-vs-Primary       | 2,82E+07*                |
| Classical-VS-Tall       | 9,71E+00*                |
| Classical-VS-Follicular | 8,74E+07*                |
| Classical-VS-Other      | 7,64E+05                 |
| Classical-VS-Normal     | 6,28E+07*                |
| Tall-VS-Follicular      | 1,62E+02*                |
| Tall-VS-Other           | 2,43E+04*                |
| Tall-VS-Normal          | 1,62E+02*                |
| Follicular-VS-Other     | 1,85E+05                 |
| Follicular-VS-Normal    | 9,52E+05                 |
| Other-VS-Normal         | 5,88E+04                 |

**Figure 3.** Expression of *NFE2L2* in THCA based on Sample types

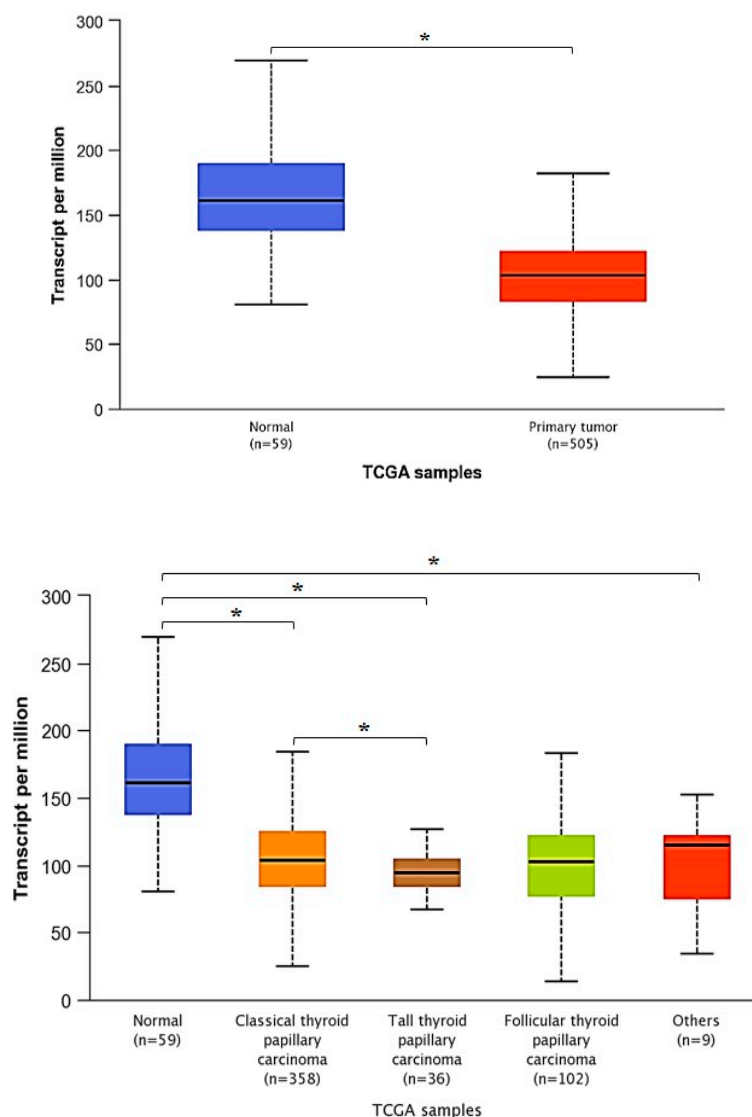

**Figure 4.** Expression of *NFE2L2* in THCA based on Tumor histology

**Tabela 2 – P values for *NFE2L2* gene comparisons.**

| Comparison              | Statistical significance |
|-------------------------|--------------------------|
| Normal-vs-Primary       | 5,44E+06*                |
| Classical-VS-Tall       | 4,12E+03*                |
| Classical-VS-Follicular | 3,90E+05                 |
| Classical-VS-Other      | 6,11E+05                 |
| Classical-VS-Normal     | 4,69E+02*                |
| Tall-VS-Follicular      | 2,21E+05                 |
| Tall-VS-Other           | 4,89E+05                 |
| Tall-VS-Normal          | 1,64E+02*                |
| Follicular-VS-Other     | 3,31E+05                 |
| Follicular-VS-Normal    | 4,97E+05                 |
| Other-VS-Normal         | 7,20E+02*                |
